# Supplementary material for: The role of CCL21/CCR7 chemokine axis in breast cancer-induced lymphangiogenesis
Source: Springer Nature journal article supplement (doi:10.1186/s12943-015-0306-4), 2015-02-09

(A)

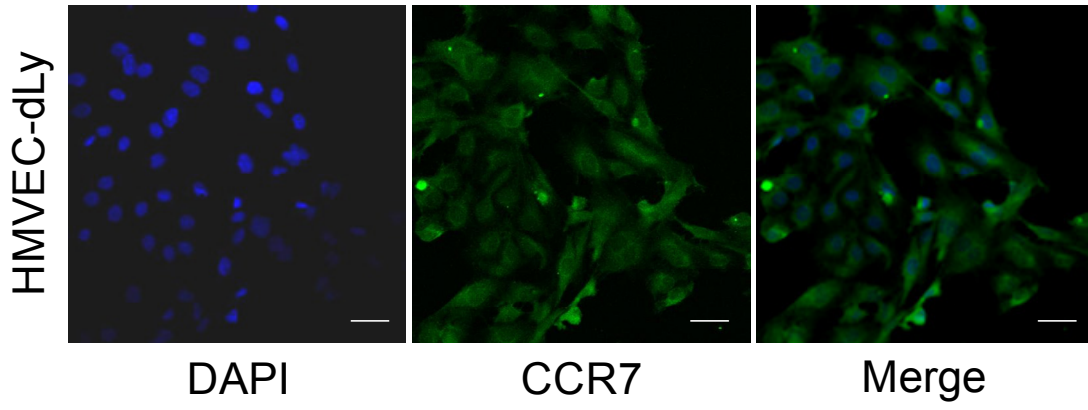

(B)

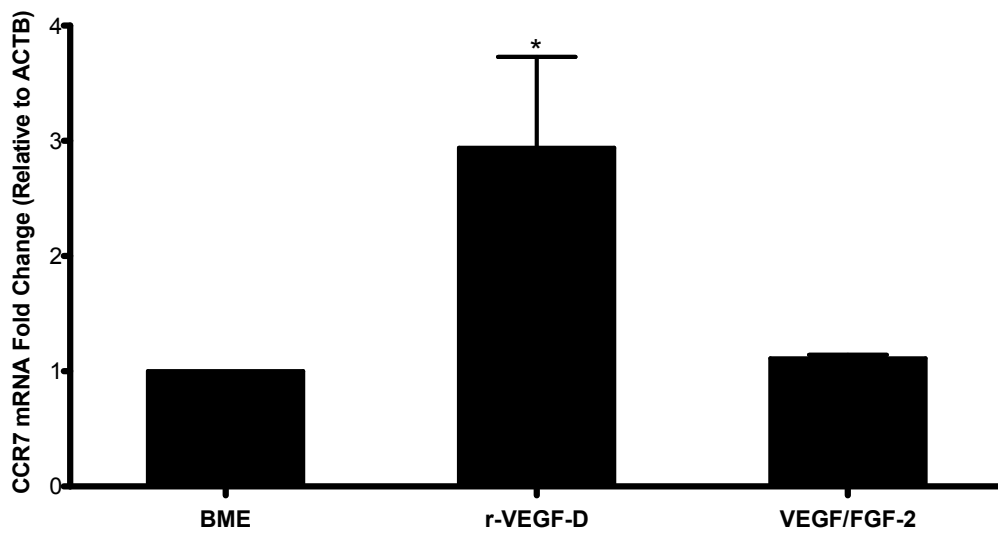

(C)

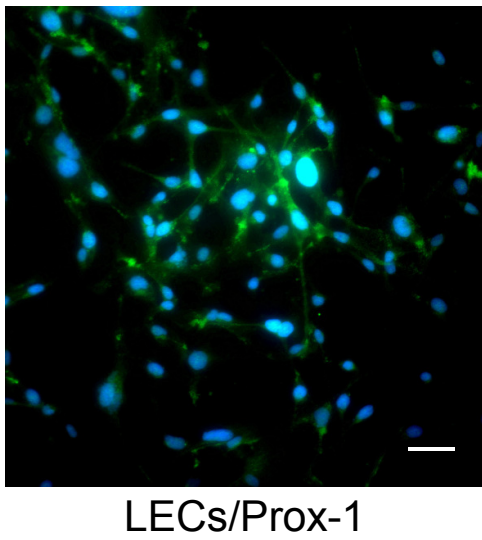

Supplement: MOESM2 [file 9762958]
